# Supplementary material for: Defect-engineered VO x cathode and novel polyvinyl alcohol@polyaniline hydrogel separator for ultra-stable fiber Zn-ion batteries
Source: Royal Society of Chemistry journal article supplement (doi:10.1039/d5ta07156a), 2025-11-22
Supplement: d5ta07156a1.pdf [file d5ta07156a1.pdf]

## Supporting Information

### Defect-engineered VO<sub>x</sub> cathode and novel polyvinyl alcohol@polyaniline hydrogel separator for ultra-stable fiber Zn-ion batteries

Yahui Zhang, Juan Xu\*, Yuezhou Jing, Mengge Ding, Jiayi Li, Pibin Bing\*, Zhongyang Li\*

School of Electrical Engineering, North China University of Water Resources and Electric Power, Zhengzhou 450003, P. R. China

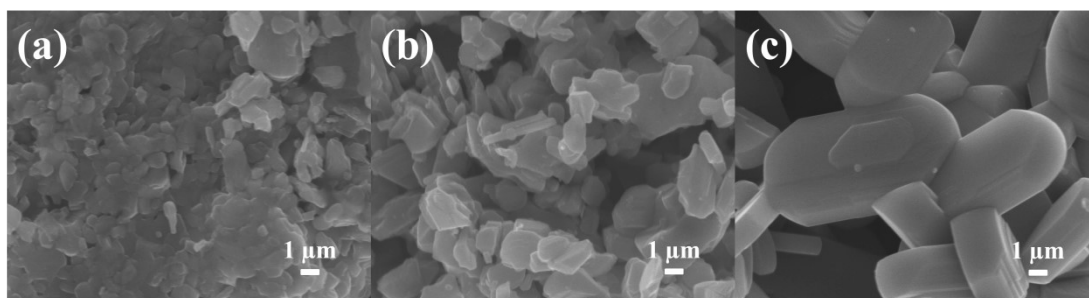

Fig S1. SEM images of (a) VO@280; (b) VO@350; (c) VO@450 composites.

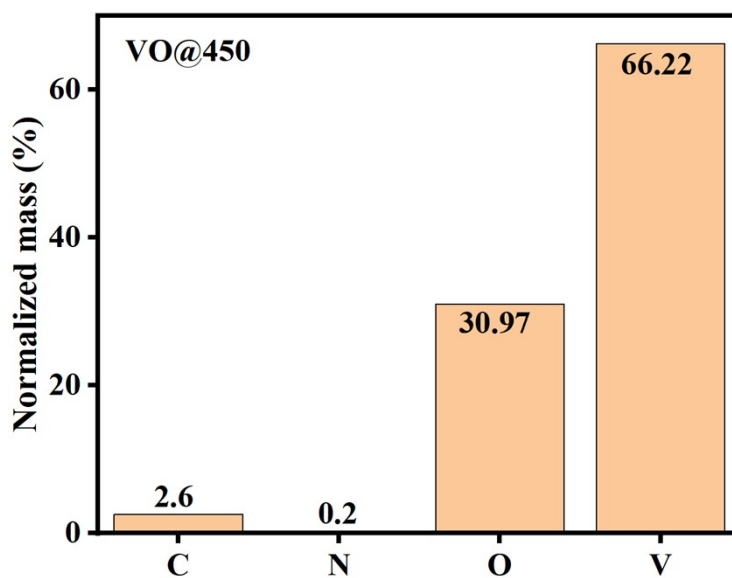

Fig S2. Normalized mass proportion of N element in VO@450 materials.

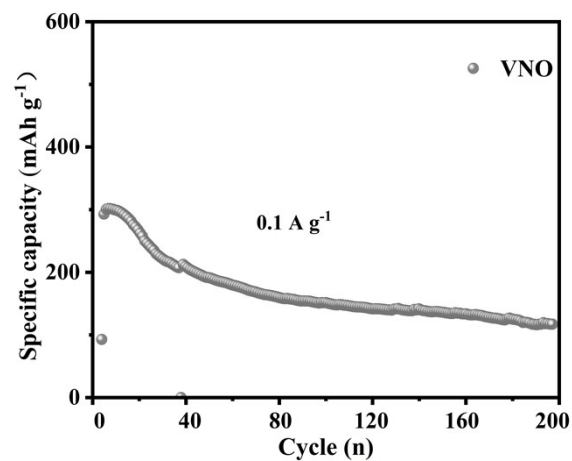

Fig S3. Cycling performance of VNO electrode at 0.1 A g<sup>-1</sup>.

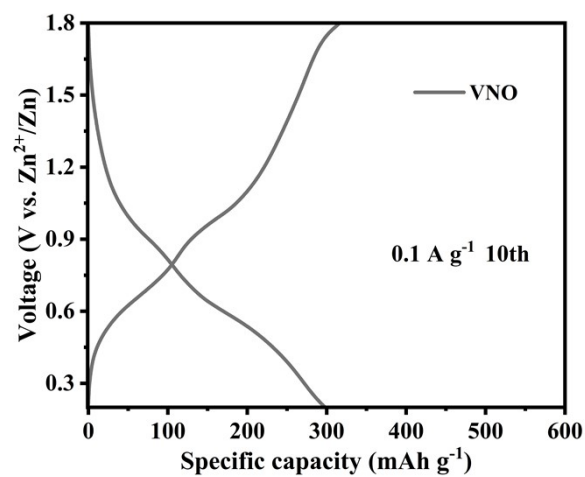

Fig S4. GCD curves of VNO electrode for the 10th turn at 0.1 A g<sup>-1</sup>.

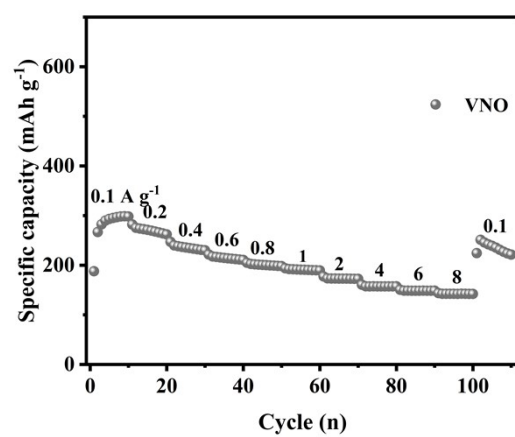

Fig S5. Rate performance of VNO electrode.

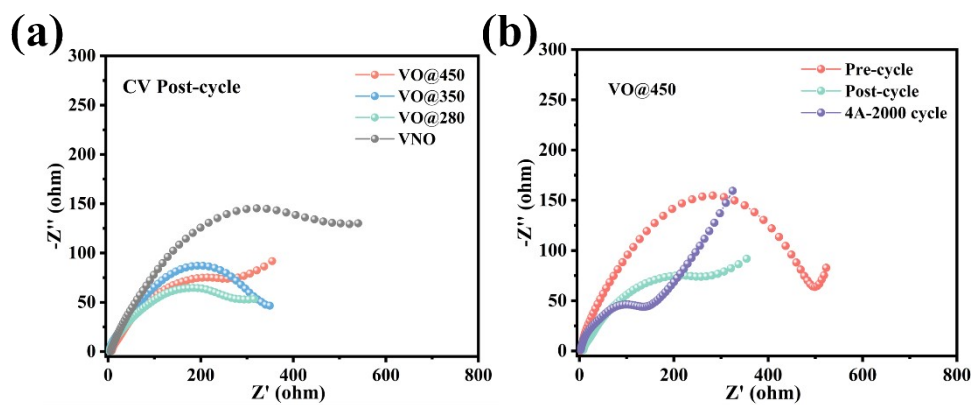

**Fig S6.** EIS curves: (a) After the CV tests; (b) Different stages of the VO@450 electrode.

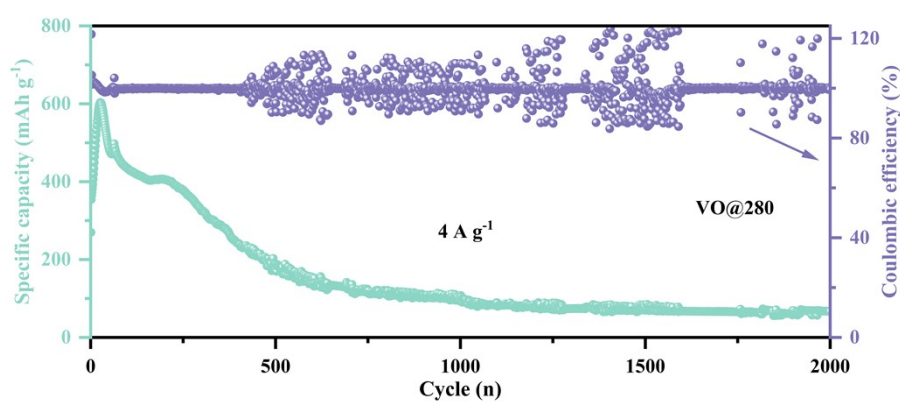

**Fig S7.** Long cycle performance of VO@280 electrodes at 4 A g<sup>-1</sup>.

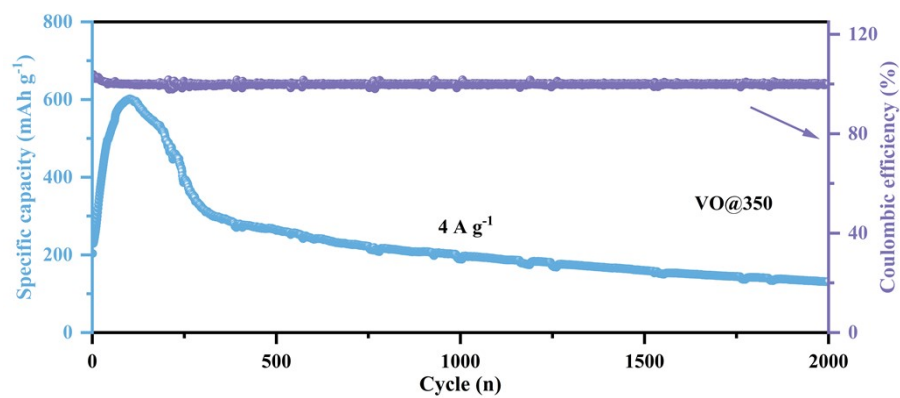

**Fig S8.** Long cycle performance of VO@350 electrodes at 4 A g<sup>-1</sup>.

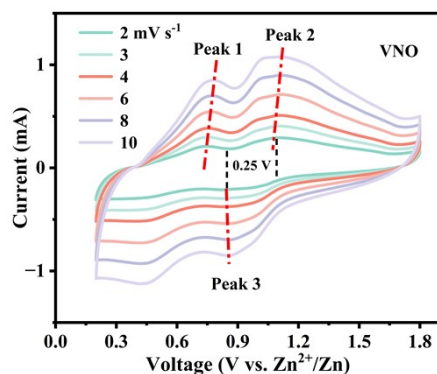

Fig S9. CV curves of the VNO electrode at varied scan rates.

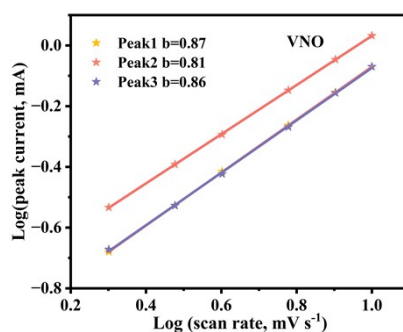

Fig S10. Plots of  $\log(i)$  vs  $\log(v)$  at specific peak currents for the VNO electrode.

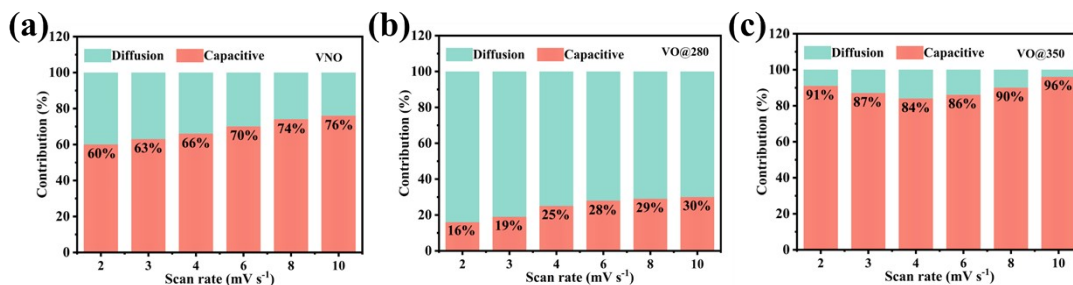

Fig S11. Capacitive and diffusion contribution at different scan rates of (a) VNO; (b) VO@280; (c) VO@350 electrodes, respectively.

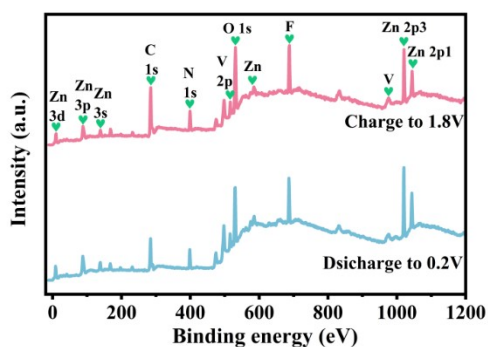

Fig S12. XPS full spectrum of VO@450 electrode at different charging/discharging states.

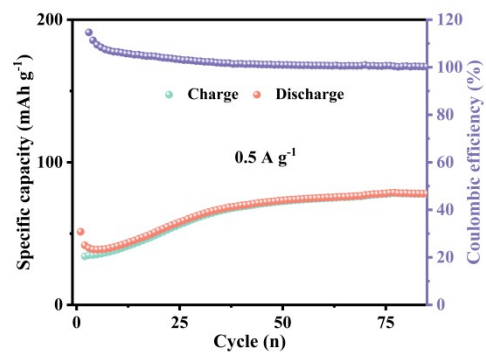

**Fig S13.** Cycling performance of the VO@450 based fiber zinc ion battery with PVA hydrogel separator at 0.5 A g<sup>-1</sup>.
